# Supplementary material
Source: ML conference proceedings conference paper supplement (https://openaccess.thecvf.com/content/ICCV2021/html/Ramon_H3D-Net_Few-Shot_High-Fidelity_ICCV_2021_paper.html)
Supplement: Supplementary file 2 [file Ramon_H3D-Net_Few-Shot_High-Fidelity_ICCV_2021_supplemental.zip]

Archive with 4 entries (4 files):
- supplementary_6166.mp4
- __MACOSX/._supplementary_6166.mp4
- supplementary_6166.pdf
- __MACOSX/._supplementary_6166.pdf
